# Supplementary material
Source: Springer Nature journal article supplement (https://www.springermedizin.de/resource/supplementary/12876_2012_923_MOESM3_ESM.pdf/9438050)
Supplement: MOESM3 [file 9438050]

White cell  
count/platelet count  
N=58

White cell count  
<5.95  
Platelet count  
<86  
N=6

White cell count  
5.95- <10.75  
Platelet count  
86 - <147.5  
N=33

White cell count  
 $\geq 10.75$   
Platelet count  
 $\geq 147.5$   
N=19

Correct: 5  
False Negative: 1

Grey Zone  
Liver Biopsy

False Positive: 0  
Correct: 19

NPV-83%

PPV-100%
